# Supplementary material
Source: PubMed Central journal article supplement (PMC3143623)

**Supplementary Table 1. Sequences of oligonucleotide primers used in this study, 5' to 3'**

|                                    |                         |                                                                                                                      |
|------------------------------------|-------------------------|----------------------------------------------------------------------------------------------------------------------|
| HM                                 | HM-fw                   | GCTGATGATACATATGATGGTTATGGACCA                                                                                       |
|                                    | HM-rv                   | AAATTCATAGCTCTTCAGCATGGAAGAATCTGGCGCTC                                                                               |
| Mut1                               | Mut1fw                  | GGGGCTGATGATATATATGGGGGTTGCAGACGCAGGGTTTGC<br>AACTCTTGCAGGGAATCAAAACATGAGTAAAGAAGAAAT                                |
|                                    | Mut1rv                  | ATTTCTTCTTTACTCATGTTTTGATTCCCTGCAAGAGTTGCAA<br>ACCCTGCGTCTGCAACCCCATATATATCATCAGCCCC                                 |
| Mut2                               | Mut2fw                  | TTGCAACTCTTACCATAATCAAAACGCAAGTAAAGAAGAAG<br>CAATCAACCTTCATTCTTCTATGTTCC                                             |
|                                    | Mut2rv                  | GGAACATAGAAGAATGAAGGTTGATTGCTTCTTCTTTACTTGC<br>GTTTTGATTATGGTGAAGAGTTGCAA                                            |
| MBS-HM                             | T7-rv                   | TATGCTAGTTATTGCTCAG                                                                                                  |
|                                    | Intein-fw               | CCCGCCGCTGCTTTTGCACGTGAG                                                                                             |
|                                    | MBSHM-fw                | GATGATCCGGGTGGAGGGCATGGACCACCACTTTGC                                                                                 |
|                                    | MBSHM-rv1               | ACCGCCGAGCCCATAGAAGAATGAAGGTTGATCATTCTTC                                                                             |
|                                    | MBSHM-rv2               | TTCAATGGAGCTGACCGCCGAGCCATAGAAGAATG                                                                                  |
|                                    | MBSHM-rv3               | TCCGGACCTTGCCTTCAATGGAGCTGACCGCCGAGCCCATAG<br>AAGAATGA                                                               |
| M52/56I-<br>BScoHM                 | M52/56I-fw              | ACTATATGTCCGCCAATCACCCTCATATCACCCTGCTGCAA<br>AAAAAAC                                                                 |
|                                    | Xho-fw                  | GGCAGCTTCAATGACTCGAGGAAG-GGGATCCGGC                                                                                  |
|                                    | HMBsco-rv               | <u>CATAGAAGAATGAAGGTTGATCATTCTTCTTTACTCATGTT-<br/>TTGATTATGGTGAAGAGTTGCAAAGTGGTGGTGCATATTGGT<br/>AAAAATAAAATCCGC</u> |
|                                    | HMBsco-fw               | <u>ATGGACCACCACTTTGCAACTCTTACCATAATCAAAACATG<br/>AGTAAAGAAGAAATGATCAACCTTCATTCTTCTATGCCGCCA<br/>ATCACCCTCATATC</u>   |
| M52/56I-<br>H55/135A-<br>BScoHM    | M52/56I-<br>H55/135A-rv | TTTTTGCAGATCGGTGATAGCAGCGGTGATTGGCGGCAT                                                                              |
|                                    | M52/56I-<br>H55/135A-fw | ATGCCGCCAATCACCCTGCTATCACCCTGCTGCAAAA                                                                                |
| ScoHM<br>Loop<br>mutant<br>primers | Intein-rv               | GGCACGATGTCGGCGATG                                                                                                   |
|                                    | ScoHMmut-fw1            | GATATAACCATGGGACAGCAGATTAAAGATCCGCTCAATTAC<br>GAGGTGGA                                                               |
|                                    | ScoHMmut-fw2            | ACGAGGTGGAGCCTTTTACATTTCAAACCAAGACGGCAAGA<br>ACGTTTCTTTA                                                             |
|                                    | ScoHMmut-fw3            | CGTTTCTTTAGAGAGTTTAAAAGGAGAAGTATGGCTGGCGGA<br>TTTTATTTTTA                                                            |
| ScoM12                             | 2Metfw5                 | TAATCAAAACATGAGTAAAGAAGAAATCATCAACCTTCATTC<br>TTCTATCCCGC                                                            |
|                                    | 2Metfw4                 | TTTATTTTTACCAATATGGACCACCACTTTGCAACTCTTCACC<br>ATAATCAAAC                                                            |
| ScoM1                              | 1Metfw5                 | TAATCAAAACATGAGTAAAGAAGAAATGATCAACCTTCATTC<br>TTCTATCCCGC                                                            |
| ScoHis                             | 4Hisfw4                 | TTTATTTTTACCAATATGGACGCCGGCTTTGCAACTCTTGCCG<br>GTAATCAAAC                                                            |

**Supplementary Table 2. Constructs used in this study (Location of His and Met residues in bold. Phe residue mutated to Trp for intrinsic fluorescence studies is shown in red).**

| Name of construct | HM-loop sequence and correlating amino acid number in wildtype ATP7A                                                                                                                                                                                                                      |
|-------------------|-------------------------------------------------------------------------------------------------------------------------------------------------------------------------------------------------------------------------------------------------------------------------------------------|
| ATP7A (MNK)       | <sup>672</sup> <b>M</b> <b>V</b> <b>M</b> <b>D</b> <b>H</b> <b>H</b> <b>F</b> <b>A</b> <b>T</b> <b>L</b> <b>H</b> <b>H</b> <b>N</b> <b>Q</b> <b>N</b> <b>M</b> <b>S</b> <b>K</b> <b>E</b> <b>E</b> <b>M</b> <b>I</b> <b>N</b> <b>L</b> <b>H</b> <b>S</b> <b>S</b> <b>M</b> <sup>699</sup> |
| Mut1              | <sup>672</sup> <b>G</b> <b>V</b> <b>A</b> <b>D</b> <b>A</b> <b>G</b> <b>F</b> <b>A</b> <b>T</b> <b>L</b> <b>A</b> <b>G</b> <b>N</b> <b>Q</b> <b>N</b> <b>M</b> <b>S</b> <b>K</b> <b>E</b> <b>E</b> <b>M</b> <b>I</b> <b>N</b> <b>L</b> <b>H</b> <b>S</b> <b>S</b> <b>M</b> <sup>699</sup> |
| Mut2              | <sup>672</sup> <b>M</b> <b>V</b> <b>M</b> <b>D</b> <b>H</b> <b>H</b> <b>F</b> <b>A</b> <b>T</b> <b>L</b> <b>H</b> <b>H</b> <b>N</b> <b>Q</b> <b>N</b> <b>A</b> <b>S</b> <b>K</b> <b>E</b> <b>E</b> <b>A</b> <b>I</b> <b>N</b> <b>L</b> <b>H</b> <b>S</b> <b>S</b> <b>M</b> <sup>699</sup> |
| MBS2HM            | <sup>674</sup> <b>M</b> <b>D</b> <b>H</b> <b>H</b> <b>F</b> <b>A</b> <b>T</b> <b>L</b> <b>H</b> <b>H</b> <b>N</b> <b>Q</b> <b>N</b> <b>M</b> <b>S</b> <b>K</b> <b>E</b> <b>E</b> <b>M</b> <b>I</b> <b>N</b> <b>L</b> <b>H</b> <b>S</b> <b>S</b> <b>M</b> <sup>699</sup>                   |
| ScoHM             | <sup>674</sup> <b>M</b> <b>D</b> <b>H</b> <b>H</b> <b>F</b> <b>A</b> <b>T</b> <b>L</b> <b>H</b> <b>H</b> <b>N</b> <b>Q</b> <b>N</b> <b>M</b> <b>S</b> <b>K</b> <b>E</b> <b>E</b> <b>M</b> <b>I</b> <b>N</b> <b>L</b> <b>H</b> <b>S</b> <b>S</b> <b>M</b> <sup>699</sup>                   |
| ScoHis            | <sup>674</sup> <b>M</b> <b>D</b> <b>A</b> <b>G</b> <b>F</b> <b>A</b> <b>T</b> <b>L</b> <b>A</b> <b>G</b> <b>N</b> <b>Q</b> <b>N</b> <b>M</b> <b>S</b> <b>K</b> <b>E</b> <b>E</b> <b>M</b> <b>I</b> <b>N</b> <b>L</b> <b>H</b> <b>S</b> <b>S</b> <b>M</b> <sup>699</sup>                   |
| ScoM1             | <sup>674</sup> <b>M</b> <b>D</b> <b>H</b> <b>H</b> <b>F</b> <b>A</b> <b>T</b> <b>L</b> <b>H</b> <b>H</b> <b>N</b> <b>Q</b> <b>N</b> <b>I</b> <b>S</b> <b>K</b> <b>E</b> <b>E</b> <b>I</b> <b>I</b> <b>N</b> <b>L</b> <b>H</b> <b>S</b> <b>S</b> <b>I</b> <sup>699</sup>                   |
| ScoM12            | <sup>674</sup> <b>M</b> <b>D</b> <b>H</b> <b>H</b> <b>F</b> <b>A</b> <b>T</b> <b>L</b> <b>H</b> <b>H</b> <b>N</b> <b>Q</b> <b>N</b> <b>M</b> <b>S</b> <b>K</b> <b>E</b> <b>E</b> <b>I</b> <b>I</b> <b>N</b> <b>L</b> <b>H</b> <b>S</b> <b>S</b> <b>I</b> <sup>699</sup>                   |

## Supplementary Figure 1

Sequence of scaffold constructs used in this study with the inserted HM-loop sequence in green:

### MBS2HM

MQEAVVKL RVEG **MDHFFATLHHNQNSKEEMINLHSSM** GSAVSSIEGKVRK LQG VVRVKV SLSNQEAVITYQP YLI  
QPEDLRDHVNDMGFEAAIKS

### ScoHM

MGQQIKDPLN YEVEPFTFQ NQDGKNV SLES LKGEVWLAD FIFTN **MDHFFATLHHNQNSKEEMINLHSSM** PPI TAA  
ITDLQKKLKAENIDVRIISFSVDPENDKPKQLKKFAANYPLSFDNWDFLTGYSQSEIEEFALKSFKAIVKKPEGEDQVIAQS  
SFYLVGPDGKVLKDYNGVENTPYDDIISDVKSASTLK

**Supplementary Figure 2 Expression and characterization of ATP7A variants in insect Sf9 cells**

(A) Sf9 cells were infected with baculoviruses encoding the full-length ATP7A (MNK), ATP7A-Mutant 1 (mut1), and ATP7A-Mutant 2 (mut2). Western blot of SDS-PAGE-separated membrane fractions using antibody directed against the ATP7A C-terminus illustrates similar expression of all variants. No protein was detected in membranes from cells infected with empty virus, used as a control. (B) Example of time course of Mut2 phosphorylation compared to wildtype ATP7A (MNK).

**A**

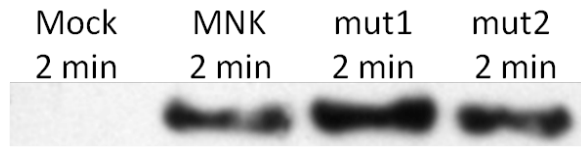

**B**

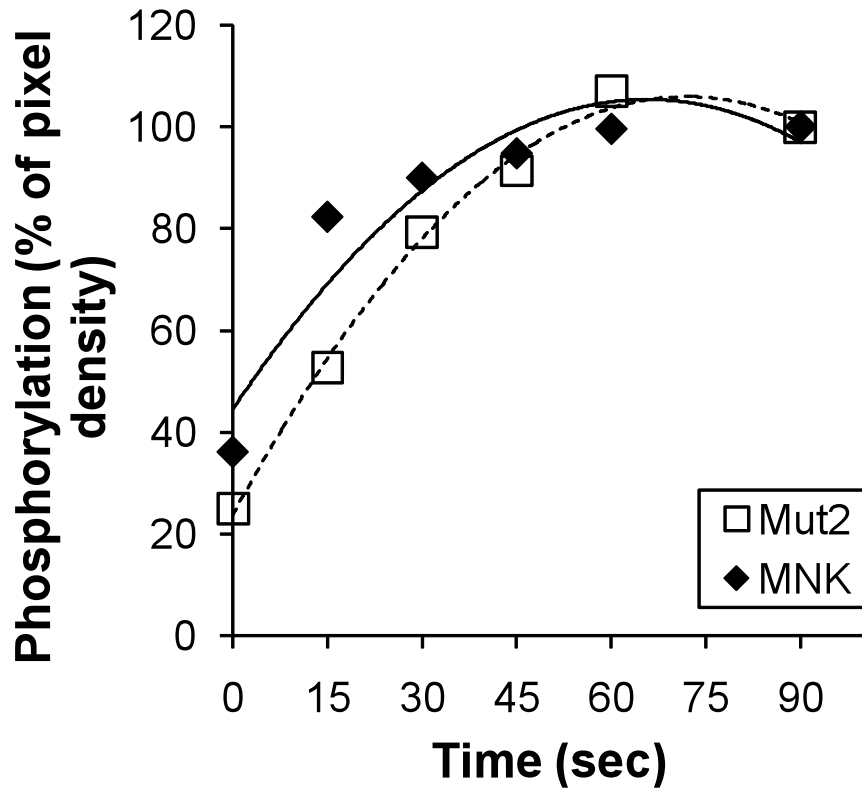

**Supplementary Figure 3 Copper binding to MBS2-HM induces significant structural change.**

Circular dichroism (CD) spectroscopy of purified recombinant MBS2-HM with and without addition of 1:2 mixture of  $\text{CuCl}_2$  and glutathione, followed by dialysis. The decrease in  $\alpha$ -helical content with simultaneous increase of the “random coil” signature” indicates that MBS-HM unfolds upon copper binding.

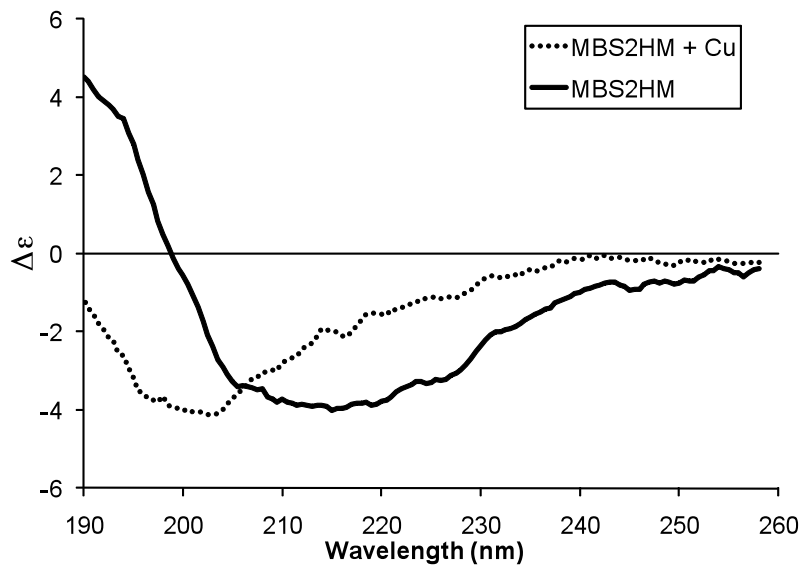

**Supplementary Figure 4. Optimization of the ascorbate content in the buffer for the BCS titration experiments.** Ascorbate was included into the buffer at increasing molar ratios to  $\text{CuCl}_2$ . BCS (1 ul o aliquots of 5 mM BCS solution) was then titrated to 500 ul solution containing 45  $\mu\text{M}$   $\text{CuCl}_2$  in 50 mM sodium phosphate, pH 7.2. The formation of  $\text{Cu(I)(BCS)}_2$  was measured at 483 nm using an absorption coefficient of  $13500 \text{ M}^{-1}\cdot\text{cm}^{-1}$  and the amount of unchelated copper was calculated by subtracting complexed from total copper.

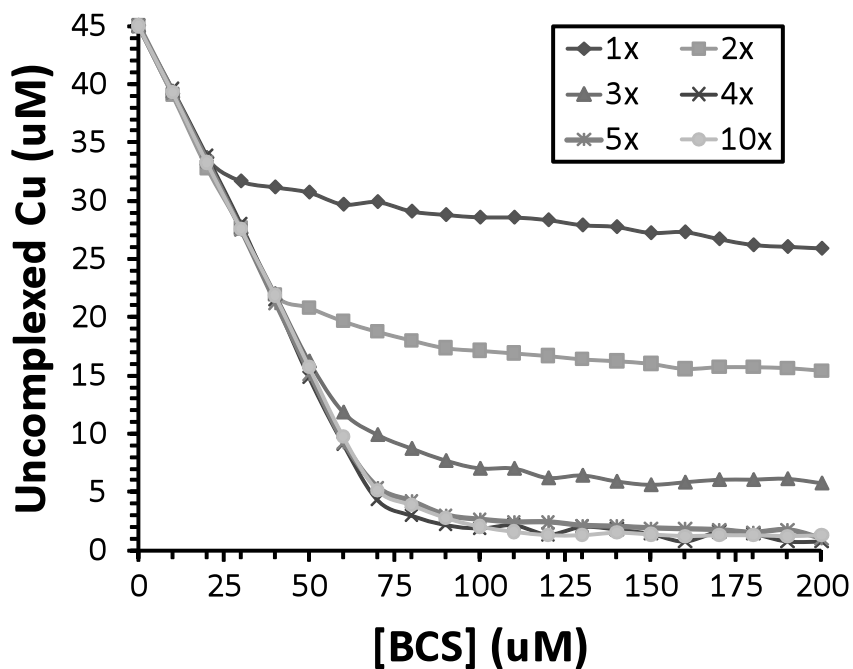

Supplement: supp_M111.229039_jbc.M111.229039-1.pdf [file supp_M111.229039_jbc.M111.229039-1.pdf]
